# Supplementary material for: Metabolomic Analysis of The Chemical Diversity of South Africa Leaf Litter Fungal Species Using an Epigenetic Culture-Based Approach
Source: MDPI journal article supplement (doi:10.3390/molecules26144262), 2021-07-14
Supplement: s1 [file s1]

## **Supplementary Materials**

# **Metabolomic Analysis of the Chemical Diversity of Leaf Litter Fungal Species Using an Epigenetic Culture-Based Approach**

**Rachel Serrano, Víctor González-Menéndez, Germán Martínez, Clara Toro, Jesús Martín, Olga Genilloud and José R. Tormo\***

Fundación MEDINA, Av. Conocimiento 34, Health Sciences Technology Park, 18016 Granada, Spain

\*Correspondence: [ruben.tormo@medinaandalucia.es](mailto:ruben.tormo@medinaandalucia.es); Tel.: +34 958 993 965

**Table S1.** Taxonomical classification of the selected 232 fungal strains isolated from leaf litter of different local plants collected in South Africa across classes, orders, families and genus. Highlighted in bold the subsets studied in detail.

| Class                  | Tax Order                  | Family                          | Genus                                       | Origin                                                                 | Dereplicated known metabolites                                                                                                |
|------------------------|----------------------------|---------------------------------|---------------------------------------------|------------------------------------------------------------------------|-------------------------------------------------------------------------------------------------------------------------------|
| <b>Agaricomycetes</b>  | <i>Corticiales</i>         | <i>Corticaceae</i>              | <i>Corticium</i> (n=2)                      | <i>Protea laurifolia</i> and <i>P. repens</i>                          | Connatusin B, Leucinostatin A and B, Terricolin                                                                               |
|                        |                            |                                 | <i>Marchandiomyces</i>                      | <i>Thamnochortus</i> sp.                                               |                                                                                                                               |
|                        | <i>Cantharellales</i>      | <i>Hydnaceae</i>                | <i>Sistotrema</i>                           | <i>Protea repens</i>                                                   |                                                                                                                               |
|                        |                            | <i>Tulasnellaceae</i>           | <i>Tulasnella</i>                           | Culm restio                                                            |                                                                                                                               |
|                        |                            | <i>Incertae sedis</i>           | <i>Chantharealles</i>                       | <i>Olea europaea</i> sbsp <i>africana</i>                              |                                                                                                                               |
|                        | <i>Polyporales</i>         | <i>Phanerochaetaceae</i>        | <i>Phanerochaete</i>                        | <i>Rafnia</i> cf. <i>triflora</i> and <i>Tarchonanthus camphorates</i> |                                                                                                                               |
|                        |                            | <i>Polyporaceae</i>             | <i>Trametes</i>                             | Oak tree <i>Quercus</i> sp.                                            |                                                                                                                               |
|                        | <i>Agaricales</i>          | <i>Physalacriaceae</i>          | <i>Cryptomarasmius</i>                      | <i>Protea repens</i>                                                   | Diorcinol                                                                                                                     |
|                        |                            | <i>Psathyrellaceae</i>          | <i>Coprinellus</i>                          | <i>Sideroxylon inerme</i>                                              |                                                                                                                               |
|                        | <i>Boletales</i>           | <i>Serpulaceae</i>              | <i>Serpula</i>                              | <i>Brabejum stellatifolium</i>                                         |                                                                                                                               |
| <b>Dothideomycetes</b> | <b><i>Pleosporales</i></b> | <b><i>Didymellaceae</i></b>     | <i>Ascochyta</i> (n=5)                      | <i>Olea europaea</i> sbsp <i>africana</i>                              | Brefeldin A, Gliovictin, Indoleacetic acid, Leptosin I and C, Massarigenin A, Ovalacin, Palmarumycin C11 and C12              |
|                        |                            |                                 | <i>Boeremia</i>                             | <i>Chrysanthemoides monilifera</i>                                     |                                                                                                                               |
|                        |                            |                                 | <i>Didymella</i> (n=3)                      | <i>Elegia capensis</i> and culm restio                                 |                                                                                                                               |
|                        |                            |                                 | <i>Neodidymelliopsis</i>                    | <i>Protea repens</i>                                                   |                                                                                                                               |
|                        |                            |                                 | <i>Phoma</i> (n=5)                          | <i>Protea repens</i> and culm restio                                   | Cordylol C, Lecanorin, Phomalairdenone                                                                                        |
|                        |                            | <b><i>Phaeosphaeriaceae</i></b> | <i>Banksiophoma</i>                         | Restio cf. <i>multiflorus</i>                                          | Aposphaerin C                                                                                                                 |
|                        |                            |                                 | <i>Neosetophoma</i>                         | Fynbos of restios                                                      |                                                                                                                               |
|                        |                            |                                 | <i>Neostagonospora</i>                      | Fynbos of restios                                                      | Resorcyllide                                                                                                                  |
|                        |                            |                                 | <i>Nodulosphaeria</i>                       | <i>Olea europaea</i> sbsp <i>africana</i>                              | Dehydromassarilactone D, Integrastatin B, Nemanolone A, Palmarumycin B1                                                       |
|                        |                            |                                 | <i>Parastagonospora</i> (n=3)               | <i>Olea europaea</i> sbsp <i>africana</i>                              | Cordylol C, Dihydrohypnophilin, Stagonolide F and C/G                                                                         |
|                        |                            |                                 | <i>Phaeosphaeria</i> (n=4)                  | <i>Olea europaea</i> sbsp <i>africana</i>                              | Dihydrohypnophilin, Mellein, 2-(3,4-Epoxy-5-heptenoyl)-5-methylpyrrole, Phaeosphaerin A and C, 11,12-hydroxyeudesm-4-en-3-one |
|                        |                            |                                 | <i>Sclerostagonospora</i> (n=2)             | <i>Elegia capensis</i>                                                 | Resorcyllide, Zearalenone, 2-(3,4-Epoxy-5-heptenoyl)-5-methylpyrrole)                                                         |
|                        |                            |                                 | Unidentified <i>Phaeosphaeriaceae</i> (n=2) | <i>Olea europaea</i> sbsp <i>africana</i>                              | Infectopyrone, Penicillimide                                                                                                  |

|                        |                     |                              |                                |                                                                        |                                                                                                                                                 |
|------------------------|---------------------|------------------------------|--------------------------------|------------------------------------------------------------------------|-------------------------------------------------------------------------------------------------------------------------------------------------|
| <i>Dothideomycetes</i> | <i>Pleosporales</i> | <i>Phaeosphaeriaceae</i>     | <i>Wojnowiciella</i>           | <i>Carpobrotus edulis</i>                                              | Bisdechlorodihydrogeodin, Pycnidione                                                                                                            |
|                        |                     | <i>Cucurbitariaceae</i>      | <i>Neocucurbitaria</i> (n=2)   | <i>Protea laurifolia</i>                                               | Infectopyrone, 6-(1,2-Dihydroxypropyl)-4-hydroxy-3-(1-oxobutyl)-2H-pyran-2-one                                                                  |
|                        |                     |                              | <i>Pyrenochaeta</i> (n=2)      | Culm restio                                                            | Indoleacetic acid, Infectopyrone                                                                                                                |
|                        |                     |                              | <i>Pyrenochaetopsis</i> (n=3)  | <i>Chrysanthemoides monilifera</i> and culm restio                     | Preussomerin L                                                                                                                                  |
|                        |                     | <i>Didymosphaeriaceae</i>    | <i>Didymosphaeria</i>          | <i>Protea laurifolia</i>                                               | Connatusin B, Diorcinol F, Deoxydihydrofusicin                                                                                                  |
|                        |                     |                              | <i>Paracamarosporium</i>       | <i>Protea laurifolia</i>                                               |                                                                                                                                                 |
|                        |                     |                              | <i>Paraconiothyrium</i> (n=2)  | <i>Protea laurifolia</i>                                               | Emodin, Globosuxanthone A, Dihydroglobosuxanthone A                                                                                             |
|                        |                     |                              | <i>Paraphaeosphaeria</i> (n=2) | <i>Protea laurifolia</i>                                               | Cordylol C                                                                                                                                      |
|                        |                     |                              | <i>Pseudocamarosporium</i>     | <i>Olea europaea</i> sbsp <i>africana</i>                              | Deoxydihydrofusicin                                                                                                                             |
|                        |                     | <i>Massariaceae</i>          | <i>Helminthosporium</i>        | Fynbos of restios                                                      |                                                                                                                                                 |
|                        |                     |                              | <i>Lophiostoma</i> (n=2)       | Culm restio                                                            | Indoleacetic acid, Preussomerin A and B, Palmarumycin B1, C15 and C16                                                                           |
|                        |                     |                              | <i>Massarina</i>               | Restio cf. <i>multiflorus</i>                                          | Dehydromassarilactone D, Infectopyrone, Pyronecine G                                                                                            |
|                        |                     |                              | <i>Vaginatipora</i> (n=2)      | Culm restio                                                            | Equisetin, Oxasetin                                                                                                                             |
|                        |                     | <i>Teichosporaceae</i>       | <i>Teichospora</i> (n=3)       | Culm restio                                                            |                                                                                                                                                 |
|                        |                     |                              | <i>Teichosporaceae</i>         | Culm restio                                                            |                                                                                                                                                 |
|                        |                     | <i>Coniothyriaceae</i>       | <i>Coniothyrium</i> (n=3)      | <i>Sideroxylon inerme</i> and culm restio                              |                                                                                                                                                 |
|                        |                     | <i>Pleosporaceae</i>         | <i>Alternaria</i> (n=3)        | <i>Protea repens</i>                                                   | Alternariol, 9-O-Methylalternariol, Altenusin, Altenuic acid, Dihydroaltenuene A, Infectopyrone, 7-O-Methylfulvic acid, Pyrenocine G, Violaceol |
|                        |                     | <i>Sporormiaceae</i>         | <i>Forliomyces</i> (n=3)       | <i>Elegia capensis</i> and culm restio                                 | Mellein                                                                                                                                         |
|                        |                     | <i>Amorosiaceae</i>          | <i>Alfoldia</i>                | <i>Rafnia</i> cf. <i>triflora</i> and <i>Tarchonanthus camphorates</i> |                                                                                                                                                 |
|                        |                     |                              | <i>Angustimassarina</i>        | Oak tree <i>Quercus</i> sp.                                            | Rugulosin                                                                                                                                       |
|                        |                     | <i>Anteagloniaceae</i>       | <i>Anteaglonium</i> (n=2)      | Oak tree <i>Quercus</i> sp.                                            | Ascochital                                                                                                                                      |
|                        |                     | <i>Cryptocoryneaceae</i>     | <i>Cryptocoryneum</i> (n=2)    | Culm restio                                                            | Palmarumycin B1, C15 and C16, Preussomerin B                                                                                                    |
|                        |                     | <i>Microsphaeropsidaceae</i> | <i>Microsphaeropsis</i> (n=2)  | <i>Thamnochortus</i> sp.                                               |                                                                                                                                                 |
|                        |                     | <i>Biatrisporaceae</i>       | <i>Nigrograna</i>              | <i>Protea repens</i>                                                   |                                                                                                                                                 |
|                        |                     | <i>Delitschiaceae</i>        | <i>Delitschia</i>              | <i>Sideroxylon inerme</i>                                              |                                                                                                                                                 |

|                 |                      |                       |                                 |                                                   |                                                                                                                                            |                                                                                                                      |
|-----------------|----------------------|-----------------------|---------------------------------|---------------------------------------------------|--------------------------------------------------------------------------------------------------------------------------------------------|----------------------------------------------------------------------------------------------------------------------|
| Dothideomycetes | Pleosporales         | Hermatomycetaceae     | Hermatomyces                    | Protea repens                                     | MDN-0104, Mycophenolic acid, Rubellin A                                                                                                    |                                                                                                                      |
|                 |                      | Lentitheciaceae       | Keissleriella                   | Fynbos of restios                                 |                                                                                                                                            |                                                                                                                      |
|                 |                      | Leptosphaeriaceae     | Leptosphaeria                   | Protea laurifolia                                 | Leptosphaeric acid                                                                                                                         |                                                                                                                      |
|                 |                      | Libertasomycetaceae   | Libertasomyces                  | Diosma subulata                                   | Akanthomycin                                                                                                                               |                                                                                                                      |
|                 |                      | Roussoellaceae        | Roussoella                      | Diosma subulata                                   | PF 1140                                                                                                                                    |                                                                                                                      |
|                 |                      | Thyridariaceae        | Lophiostoma                     | Culm restio                                       | Bipolaride B, Oxasetin                                                                                                                     |                                                                                                                      |
|                 |                      | Torulaceae            | Dendryphiella                   | Culm restio                                       |                                                                                                                                            |                                                                                                                      |
|                 |                      | Incertae sedis        | Parapyrenochaeta                | Elegia capensis                                   | Infectopyrone                                                                                                                              |                                                                                                                      |
|                 |                      |                       | Unidentified Pleosporales (n=8) | Culm restio                                       | Dehydromassarilactone D, Dihydrohypnophilin, Diorcinol F, Indoleacetic acid, Lecanorin, Pyrenocine G, Radicinin, Deoxyradicinin, Radicinol |                                                                                                                      |
|                 | Capnodiales          | Teratosphaeriaceae    | Austroafricana (n=3)            | Olea europaea sbsp africana and Protea repens     |                                                                                                                                            |                                                                                                                      |
|                 |                      |                       | Neocatenulostroma               | Oak tree Quercus sp.                              |                                                                                                                                            |                                                                                                                      |
|                 |                      |                       | Neophaeothecoidea               | Protea laurifolia                                 |                                                                                                                                            |                                                                                                                      |
|                 |                      |                       | Parateratosphaeria              | Rafnia cf. triflora and Tarchonanthus camphorates |                                                                                                                                            |                                                                                                                      |
|                 |                      | Cladosporiaceae       | Cladosporium                    | Culm restio                                       |                                                                                                                                            |                                                                                                                      |
|                 |                      |                       | Verrucocladosporium             | Carpobrotus edulis                                |                                                                                                                                            |                                                                                                                      |
|                 | Dothideales          | Dothioraceae          | Dothiora (n=3)                  | Oak tree Quercus sp.                              | Coriolide, Coleophomone A/B, Lecanorin, Ovalacin                                                                                           |                                                                                                                      |
|                 |                      |                       | Kabatina                        | Culm restio                                       | Palmarumycin C12                                                                                                                           |                                                                                                                      |
|                 |                      | Sacchettoeciaceae     | Dothichiza                      | Oak tree Quercus sp.                              | Monocerin                                                                                                                                  |                                                                                                                      |
|                 | Botryosphaeriales    | Botryosphaeriaceae    | Neofusicoccum                   | Protea repens                                     | O-Methyldihydrobotrydial                                                                                                                   |                                                                                                                      |
|                 |                      | Incertae sedis        | Camarosporium (n=2)             | Diosma subulata and Elegia capensis               | Cordyol C and E, Deoxydihydrofusicin Lecanorin                                                                                             |                                                                                                                      |
|                 | Venturiales          | Venturiaceae          | Anungitea                       | Protea laurifolia                                 | Secalonic acid C                                                                                                                           |                                                                                                                      |
|                 |                      |                       | Venturia                        | Olea europaea sbsp africana                       |                                                                                                                                            |                                                                                                                      |
|                 | Hysteriales          | Hysteriaceae          | Hysterium                       | Thamnochortus sp.                                 |                                                                                                                                            |                                                                                                                      |
|                 | Superstratomycetales | Superstratomycetaceae | Superstratomyces                | Protea laurifolia                                 |                                                                                                                                            |                                                                                                                      |
|                 | Tubeufiales          | Incertae sedis        | Neorhamphoria                   | Protea laurifolia                                 |                                                                                                                                            |                                                                                                                      |
|                 | Incertae sedis       | Pseudoperisporiaceae  | Nematostoma                     | Protea repens                                     |                                                                                                                                            |                                                                                                                      |
|                 |                      | Incertae sedis        | Pyrenochaeta                    | Culm restio                                       | Infectopyrone                                                                                                                              |                                                                                                                      |
|                 |                      |                       | Scleroconidioma (n=2)           | Protea laurifolia and P. repens                   | Antibiotic AS 2077715                                                                                                                      |                                                                                                                      |
|                 | Leotiomyces          | Helotiales            | Arachnopezizaceae               | Arachnopeziza (n=2)                               | Olea europaea sbsp africana                                                                                                                | Altersolanol G, Citreoviridin, Citrinin, Cytochalasin F/B, Radicinin, Rhacodione B, Graphis lactone E acetone adduct |

|                        |                       |                               |                                      |                                                                                                                      |                                                                                                                                                                 |
|------------------------|-----------------------|-------------------------------|--------------------------------------|----------------------------------------------------------------------------------------------------------------------|-----------------------------------------------------------------------------------------------------------------------------------------------------------------|
| <i>Leotiomycetes</i>   | <i>Helotiales</i>     | <i>Discinellaceae</i>         | <i>Fontanospora</i>                  | <i>Brabejum stellatifolium</i>                                                                                       | Virgineone                                                                                                                                                      |
|                        |                       | <i>Hamatocanthoscyphaceae</i> | <i>Chalara</i>                       | Oak tree <i>Quercus</i> sp.                                                                                          |                                                                                                                                                                 |
|                        |                       | <i>Hamatocanthoscyphaceae</i> | <i>Xenopolyscytatum</i>              | <i>Olea europaea</i> sbsp <i>africana</i>                                                                            | Rhacodione B                                                                                                                                                    |
|                        |                       | <i>Helotiaceae</i>            | <i>Hymenoscyphus</i>                 | <i>Olea europaea</i> sbsp <i>africana</i>                                                                            |                                                                                                                                                                 |
|                        |                       |                               | <i>Lanzia</i>                        | <i>Carpobrotus edulis</i>                                                                                            |                                                                                                                                                                 |
|                        |                       | <i>Hyaloscyphaceae</i>        | <i>Meliniomyces</i>                  | Oak tree <i>Quercus</i> sp.                                                                                          |                                                                                                                                                                 |
|                        |                       | <i>Loramycetaceae</i>         | <i>Acidomelania</i>                  | <i>Protea repens</i>                                                                                                 | Citrinin                                                                                                                                                        |
|                        |                       | <i>Mollisiaceae</i>           | <i>Mollisia</i>                      | <i>Protea repens</i>                                                                                                 |                                                                                                                                                                 |
|                        |                       | <i>Sclerotiniaceae</i>        | <i>Stromatinia</i>                   | Fynbos of restios                                                                                                    |                                                                                                                                                                 |
|                        |                       | <i>Solenopezziaceae</i>       | <i>Tetracladium</i>                  | Culm restio                                                                                                          |                                                                                                                                                                 |
|                        |                       | <i>Incertae sedis</i>         | <i>Phialea</i>                       | <i>Protea laurifolia</i>                                                                                             |                                                                                                                                                                 |
|                        |                       |                               | Unidentified <i>Helotiales</i> (n=6) | <i>Protea laurifolia</i> , <i>P. repens</i> , Oak tree <i>Quercus</i> sp., <i>Olea europaea</i> sbsp <i>africana</i> | Citrinin                                                                                                                                                        |
|                        | <i>Rhytismatales</i>  | <i>Calloriaceae</i>           | <i>Dactylaria</i> (n=2)              | <i>Protea repens</i> and culm restio                                                                                 | PF 1140                                                                                                                                                         |
|                        |                       | <i>Rhytismataceae</i>         | <i>Lophodermium</i>                  | Fynbos of restios                                                                                                    |                                                                                                                                                                 |
|                        | <i>Erysiphales</i>    | <i>Amorphothecaceae</i>       | <i>Oidiodendron</i> (n=2)            | Oak tree <i>Quercus</i> sp.                                                                                          | Asteric acid, Bisdechlorodihydrogeodin, 4/3-hydroxymellein, Dehydromassarilactone D, Deoxydihydrofusicin, Diorcinol F, Epicoccone, Fuscinarin, Trichothecinol A |
|                        | <i>Incertae sedis</i> | <i>Neocrinulaceae</i>         | <i>Neocrinula</i>                    | <i>Protea repens</i>                                                                                                 |                                                                                                                                                                 |
|                        |                       | <i>Incertae sedis</i>         | <i>Coleophoma</i> (n=2)              | <i>Protea repens</i> and <i>Olea europaea</i> sbsp <i>africana</i>                                                   |                                                                                                                                                                 |
|                        |                       | <i>Calloriaceae</i>           | <i>Meliniomyces</i>                  | <i>Olea europaea</i> sbsp <i>africana</i>                                                                            | Brefeldin A                                                                                                                                                     |
| <i>Sordariomycetes</i> | <i>Hypocreales</i>    | <i>Nectriaceae</i>            | <i>Cosmospora</i>                    | Oak tree <i>Quercus</i> sp.                                                                                          | Cephalochromin, Diorcinol F, Ustilaginoidin A and J                                                                                                             |
|                        |                       |                               | <i>Dactylonectria</i>                | <i>Sideroxylon inerme</i>                                                                                            |                                                                                                                                                                 |
|                        |                       |                               | <i>Fusarium</i> (n=3)                | Culm restio                                                                                                          | Beauvericin, Dehydrofusaric acid, 5,6-Dehydrozearelenone, Equisetin, Lucilactaene, 6-Methoxyvestitol, Trichosetin                                               |
|                        |                       |                               | <i>Fusicladium</i>                   | Culm restio                                                                                                          |                                                                                                                                                                 |
|                        |                       |                               | <i>Volutella</i>                     | <i>Sideroxylon inerme</i>                                                                                            |                                                                                                                                                                 |
|                        |                       | <i>Bionectriaceae</i>         | <i>Bryocentria</i>                   | <i>Sideroxylon inerme</i>                                                                                            |                                                                                                                                                                 |
|                        |                       | <i>Hypocreaceae</i>           | <i>Acrostalagmus</i>                 | <i>Protea repens</i>                                                                                                 | Exophilic acid, Melinacidin II                                                                                                                                  |
|                        |                       | <i>Stachybotryaceae</i>       | <i>Sirastachys</i>                   | <i>Rafnia</i> cf. <i>triflora</i> and <i>Tarchonanthus camphorates</i>                                               | Mellein                                                                                                                                                         |
|                        |                       | <i>Incertae sedis</i>         | <i>Acremonium</i>                    | <i>Protea repens</i>                                                                                                 | Deoxydihydrofusicin                                                                                                                                             |
|                        |                       |                               | <i>Sarocladium</i>                   | <i>Protea laurifolia</i>                                                                                             |                                                                                                                                                                 |

|                        |                         |                            |                                      |                                                                        |                                                                                     |
|------------------------|-------------------------|----------------------------|--------------------------------------|------------------------------------------------------------------------|-------------------------------------------------------------------------------------|
| <b>Sordariomycetes</b> | <b>Xylariales</b>       | <b>Xylariaceae</b>         | <i>Anthostomella</i> (n=2)           | <i>Sideroxylon inerme</i>                                              | Anhydrosepedonin, 5-Formylmellein, Heptelidic acid, Hydroheptelidic acid, Ternatin, |
|                        |                         |                            | <i>Anthostomelloides</i>             | <i>Protea repens</i>                                                   | Cytochalasin K and H, Heptelidic acid, Hydroheptelidic acid, Ternatin               |
|                        |                         |                            | <i>Circinotrichum</i> (n=2)          | <i>Carpobrotus edulis</i> and <i>Sideroxylon inerme</i>                | Antibiotic TMC 264, Cinatrin B, Connatusin B, Rhizopicnin A                         |
|                        |                         | <i>Diatrypaceae</i>        | <i>Monosporascus</i>                 | <i>Thamnochortus</i> sp.                                               | 4-Hydroxy-5-methylmellein                                                           |
|                        |                         | <i>Hypoxylaceae</i>        | <i>Daldinia</i>                      | <i>Sideroxylon inerme</i>                                              | Indoleacetic acid                                                                   |
|                        |                         | <i>Incertae sedis</i>      | <i>Pleurophoma</i>                   | Fynbos of restios                                                      |                                                                                     |
|                        | <b>Amphisphaeriales</b> | <i>Bartaliniaceae</i>      | <i>Bartalinia</i> (n=2)              | <i>Diosma subulata</i> and <i>Sideroxylon inerme</i>                   | Lecanorin, Mellein, 4/3-hydroxymellein, N-deoxyakanthomycin                         |
|                        |                         | <i>Amphisphaeriaceae</i>   | <i>Immersidiscosia</i>               | <i>Olea europaea</i> sbsp <i>africana</i>                              | Antibiotic TMC 264, Secalonic acid C, Ulocladol                                     |
|                        |                         | <i>Discosiaceae</i>        | <i>Discosia</i>                      | <i>Brabejum stellatifolium</i>                                         | Naematolin, Photinide A                                                             |
|                        |                         | <i>Phlogicylindriaceae</i> | <i>Phlogicylindrium</i>              | <i>Olea europaea</i> sbsp <i>africana</i>                              |                                                                                     |
|                        |                         | <i>Sporocadaceae</i>       | <i>Sarcostroma</i>                   | <i>Protea repens</i>                                                   | Diorcinol, Nemanolone A                                                             |
|                        | <b>Togniniales</b>      | <b>Togniniaceae</b>        | <i>Phaeoacremonium</i>               | <i>Rafnia</i> cf. <i>triflora</i> and <i>Tarchonanthus camphorates</i> | Desferri-triacetulfusigen                                                           |
|                        |                         |                            | <i>Togninia</i>                      | <i>Protea repens</i>                                                   |                                                                                     |
|                        | <b>Myrmecridiales</b>   | <i>Incertae sedis</i>      | <i>Myrmecridium</i>                  | Fynbos of restios                                                      |                                                                                     |
|                        | <b>Sordariales</b>      | <i>Incertae sedis</i>      | Unidentified Sordariales             | <i>Olea europaea</i> sbsp <i>africana</i>                              |                                                                                     |
|                        | <b>Incertae sedis</b>   | <i>Apiosporaceae</i>       | <i>Arthrinium</i> (n=3)              | <i>Thamnochortus</i> sp. and <i>Elegia capensis</i>                    | Alternariol, Brefeldin A, Cordyol C, Cytochalasin K, N-Hydroxyapiosporamide,        |
|                        |                         | <i>Incertae sedis</i>      | <i>Pleurophoma</i>                   | Fynbos of restios                                                      |                                                                                     |
| <b>Eurotiomycetes</b>  | <b>Chaetothyriales</b>  | <i>Herpotrichiellaceae</i> | <i>Capronia</i>                      | <i>Diosma subulata</i>                                                 | Exophilic acid                                                                      |
|                        |                         |                            | <i>Cladophialophora</i>              | <i>Protea laurifolia</i>                                               | Mellein                                                                             |
|                        |                         |                            | <i>Exophiala</i> (n=3)               | <i>Protea laurifolia</i>                                               |                                                                                     |
|                        |                         | <i>Coccodiniaceae</i>      | <i>Microxiphium</i>                  | <i>Olea europaea</i> sbsp <i>africana</i>                              | Quinolactacin A2, Radicidin                                                         |
|                        |                         | <i>Incertae sedis</i>      | Unidentified <i>Chaetothyriales</i>  | <i>Elegia capensis</i>                                                 |                                                                                     |
|                        | <b>Eurotiales</b>       | <i>Aspergillaceae</i>      | <i>Penicillium</i> (n=4)             | <i>Protea laurifolia</i>                                               | Antibiotic NG 011, Secalonic acid C, Chaetoglobus P/N and K/L                       |
|                        | <b>Phaeomoniellales</b> | <i>Phaeomoniellaceae</i>   | <i>Phaeomoniella</i> (n=2)           | <i>Protea laurifolia</i>                                               |                                                                                     |
|                        |                         |                            | Unidentified <i>Phaeomoniellales</i> | <i>Protea laurifolia</i>                                               | Cerebroside C, Coriolide, Lecanorin                                                 |
|                        |                         | <i>Celotheliaceae</i>      | <i>Neophaeomoniella</i>              | <i>Diosma subulata</i>                                                 |                                                                                     |
| <b>Pezizomycetes</b>   | <b>Pezizales</b>        | <i>Sarcosomataceae</i>     | <i>Conoplea</i>                      | <i>Protea repens</i>                                                   |                                                                                     |

|                            |                        |                         |                            |                                                                                                                                                            |                                                                                                                                                              |
|----------------------------|------------------------|-------------------------|----------------------------|------------------------------------------------------------------------------------------------------------------------------------------------------------|--------------------------------------------------------------------------------------------------------------------------------------------------------------|
| <i>Pezizomycetes</i>       | <i>Pezizales</i>       | <i>Sarcosomataceae</i>  | <i>Plectania</i> (n=2)     | <i>Brabejum stellatifolium</i> and<br><i>Protea repens</i>                                                                                                 | Isogaliellalactone                                                                                                                                           |
| <i>Cystobasidiomycetes</i> | <i>Cystobasidiales</i> | <i>Cystobasidiaceae</i> | <i>Cystobasidium</i>       | <i>Elegia capensis</i>                                                                                                                                     | Citrinin                                                                                                                                                     |
| <i>Umbelopsidomycetes</i>  | <i>Umbelopsidales</i>  | <i>Umbelopsidaceae</i>  | <i>Umbelopsis</i>          | <i>Olea europaea</i> sbsp <i>africana</i>                                                                                                                  |                                                                                                                                                              |
| <i>Wallemiomycetes</i>     | <i>Wallemiales</i>     | <i>Wallemiaceae</i>     | <i>Wallemia</i>            | <i>Protea repens</i>                                                                                                                                       |                                                                                                                                                              |
| <i>Microbotryomycetes</i>  | <i>Sporidiobolales</i> | <i>Sporidiobolaceae</i> | <i>Sporobolomyces</i>      | <i>Protea laurifolia</i>                                                                                                                                   |                                                                                                                                                              |
| <i>Orbiliomycetes</i>      | <i>Orbiliales</i>      | <i>Orbiliaceae</i>      | <i>Orbilina</i>            | <i>Protea repens</i>                                                                                                                                       |                                                                                                                                                              |
| <i>Incertae sedis</i>      | <i>Incertae sedis</i>  | <i>Incertae sedis</i>   | <i>Anthopsis</i> (n=2)     | <i>Chrysanthemoides monilifera</i>                                                                                                                         |                                                                                                                                                              |
|                            |                        |                         | <i>Ochroconis</i>          | <i>Protea repens</i>                                                                                                                                       |                                                                                                                                                              |
|                            |                        |                         | <i>Polyscytalum</i> (n=2)  | Oak tree <i>Quercus</i> sp.                                                                                                                                | Mellein, 4/3Hydroxymellein                                                                                                                                   |
|                            |                        |                         | <i>Pseudosigmoidea</i>     | Oak tree <i>Quercus</i> sp.                                                                                                                                |                                                                                                                                                              |
|                            |                        |                         | <i>Rhexodenticula</i>      | <i>Protea laurifolia</i>                                                                                                                                   |                                                                                                                                                              |
|                            |                        |                         | <i>Unidentified</i> (n=10) | Fynbos of restios,<br><i>Chrysanthemoides monilifera</i> ,<br><i>Elegia capensis</i> , <i>Protea repens</i> ,<br><i>Olea europaea</i> sbsp <i>africana</i> | Connatusin B, N-deoxyakanthomycin,<br>11-Hydroxycurvularin, MDN-0101 [42],<br>Nemanolone A, Pandangolide 2,<br>Preussomerin L, Questiomycin A, Resorcylicide |
